# Supplementary material
Source: Frontiers journal article supplement (https://www.frontiersin.org/articles/522356)
Supplement: Data_Sheet_1.PDF [file Data_Sheet_1.PDF]

## Impact of chemical and alternative fungicides applied to grapevine cv Nebbiolo on microbial ecology and chemical-physical grape characteristics at harvest

Kalliopi Rantsiou, Simone Giacosa, Massimo Pugliese, Vasileios Englezos, Ilario Ferrocino, Susana Río Segade, Matteo Monchiero, Ivana Gribaudo, Giorgio Gambino, Maria Lodovica Gullino, Luca Rolle

### Supplementary Figures

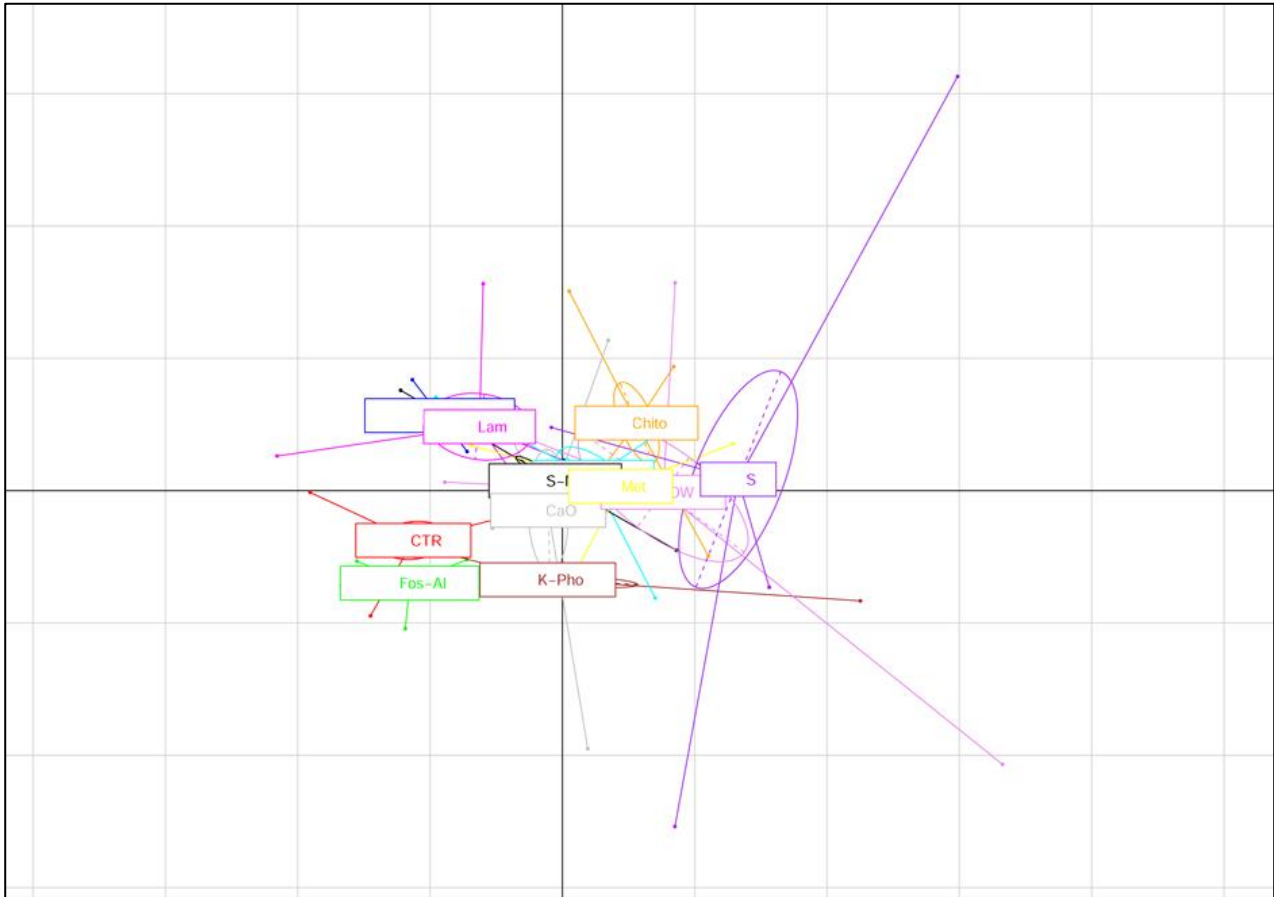

**Figure S1.** Principal Component Analysis (PCA) based on OTUs' relative abundance in the grape mycobiota. Samples are colour coded according to treatment. The first component (horizontal) accounts for 25.11% of the variance and the second component (vertical) accounts for 20.55%. Treatment descriptions are reported in Table 1.

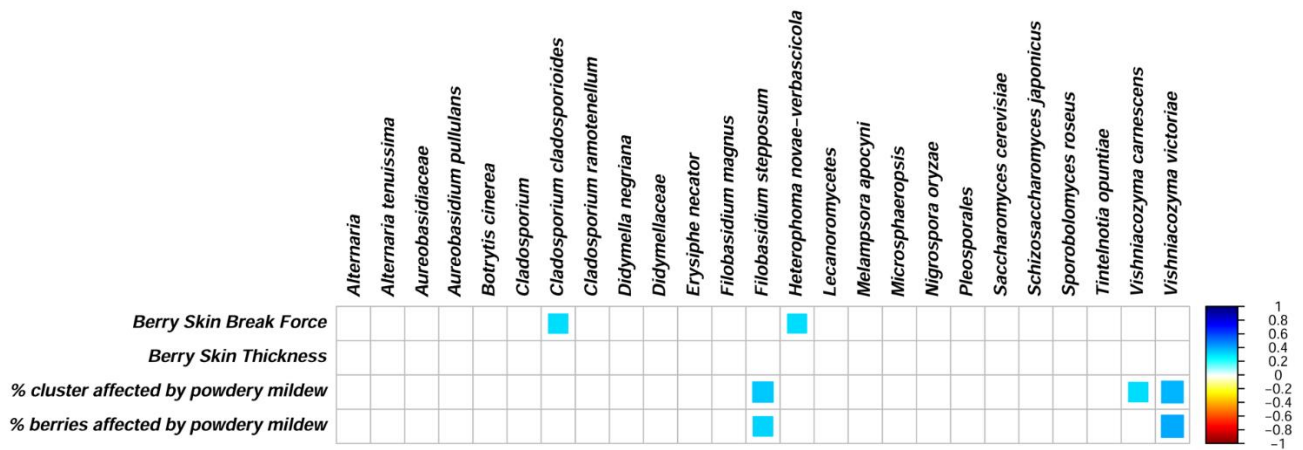

**Figure S2.** Spearman’s rank correlation matrix of mycobiota abundance, disease index and berry skin mechanical properties. The colours of the scale bar denote the nature of the correlation, with 1 indicating a positive correlation (blue) and -1 indicating a negative correlation (dark red) between the two datasets. Only correlations with an FDR value lower than 0.05 are displayed.
